# Supplementary material for: Characterization of Genome-Methylome Interactions in 22 Nuclear Pedigrees
Source: PLoS One. 2014 Jul 14;9(7):e99313. doi: 10.1371/journal.pone.0099313 (PMC4096397; doi:10.1371/journal.pone.0099313)
Supplement: Table S12 — Bisulfite sequencing and mapping summary. (XLSX) [file pone.0099313.s012.xlsx]

## Sheet: Sheet1
Table S12. Bisulfite sequencing and mapping summary.
Sample IDs	Total # of reads	Total sequences (bps)	# of CpGs called	Read mapping rate (%)
FAM1-01	28736820	2873682000	509557	83.808
FAM1-02	29667238	2966723800	531349	83.3993
FAM1-03	27496303	2749630300	469524	83.8079
FAM1-04	41423659	4142365900	465440	83.6843
FAM2-03	23772490	2377249000	452747	80.4148
FAM2-01	36086877	3608687700	602417	83.6395
FAM2-02	28434816	2843481600	476559	77.9423
FAM2-04	27898870	2789887000	533210	84.6492
FAM3-01	24311174	2431117400	424140	81.0004
FAM3-02	39806932	3980693200	528068	83.755
FAM3-03	28163324	2816332400	515171	84.284
FAM3-04	36910347	3691034700	564782	83.9398
FAM3-05	22034190	2203419000	415293	83.9059
FAM4-03	38392094	3839209400	525089	83.9424
FAM4-01	26555832	2655583200	525616	84.623
FAM4-02	29282669	2928266900	552348	83.8427
FAM4-04	29894720	2989472000	556270	84.3061
FAM5-01	22644448	2264444800	511613	84.6438
FAM5-02	23671239	2367123900	496892	84.5014
FAM5-03	28613321	2861332100	446836	83.6338
FAM5-04	23493166	2349316600	462847	84.3464
FAM5-05	25947402	2594740200	450390	83.0934
FAM6-03	36110018	3611001800	560418	83.8096
FAM6-01	26243170	2624317000	502841	83.1564
FAM6-02	46621413	4662141300	535596	83.3471
FAM6-04	33428951	3342895100	511033	83.868
FAM7-03	35494338	3549433800	497840	83.2344
FAM7-01	58790350	5879035000	591533	86.3733
FAM7-02	30230506	3023050600	534443	84.2401
FAM7-04	30541568	3054156800	575882	84.1692
FAM7-05	34514522	3451452200	510366	83.4156
FAM8-03	28030732	2803073200	457359	83.3444
FAM8-01	22737764	2273776400	419500	84.7497
FAM8-02	22849992	2284999200	392012	84.0498
FAM8-04	26069072	2606907200	533417	84.7745
FAM8-05	35199211	3519921100	496438	82.6474
FAM9-03	31618909	3161890900	582371	82.5026
FAM9-01	23475102	2347510200	454397	83.6255
FAM9-02	26916806	2691680600	516524	80.3094
FAM9-04	29301002	2930100200	509783	84.8851
FAM10-01	28239976	2823997600	526659	84.8206
FAM10-02	23072810	2307281000	471263	81.5603
FAM10-03	24347824	2434782400	477957	85.1274
FAM10-04	26487112	2648711200	502733	84.0797
FAM11-01	39785848	3978584800	513726	82.9321
FAM11-02	38907525	3890752500	545473	83.3323
FAM11-03	29661178	2966117800	548216	84.1167
FAM11-04	26597944	2659794400	488122	84.5899
FAM12-01	47801853	4780185300	597812	82.6818
FAM12-02	24354921	2435492100	513885	85.4334
FAM12-03	30256243	3025624300	442355	84.7286
FAM12-04	22928724	2292872400	403389	84.4273
FAM12-05	24879729	2487972900	447306	83.3741
FAM13-03	34067692	3406769200	548426	84.2558
FAM13-01	37498794	3749879400	523379	83.5008
FAM13-02	29145978	2914597800	503938	83.1729
FAM13-04	26357849	2635784900	533030	84.4127
FAM13-05	32423187	3242318700	511194	82.1804
FAM14-01	24099990	2409999000	435826	83.2085
FAM14-02	30426177	3042617700	536077	84.2707
FAM14-03	22922954	2292295400	464844	83.3572
FAM14-04	24095034	2409503400	485757	82.6293
FAM14-05	56810452	5681045200	586153	83.6747
FAM15-01	22453378	2245337800	407647	84.5611
FAM15-02	29047944	2904794400	501783	83.8659
FAM15-03	30595179	3059517900	522666	83.1191
FAM15-04	46079530	4607953000	626539	81.0416
FAM16-01	25228176	2522817600	481897	81.5877
FAM16-02	32510967	3251096700	511563	84.1423
FAM16-03	32238263	3223826300	532349	83.5693
FAM16-04	38786681	3878668100	491566	83.4608
FAM17-01	23979234	2397923400	519261	81.9718
FAM17-02	50550346	5055034600	582644	81.25
FAM17-03	38803390	3880339000	517997	79.9063
FAM17-04	25676102	2567610200	434884	83.1988
FAM18-03	27860117	2786011700	533385	82.4449
FAM18-01	28324086	2832408600	553485	81.1037
FAM18-02	25352252	2535225200	523439	83.9261
FAM18-04	44485628	4448562800	501619	83.812
FAM19-03	24476778	2447677800	466446	84.8153
FAM19-01	32194508	3219450800	477059	83.1001
FAM19-02	32769068	3276906800	523395	83.7721
FAM19-04	26195040	2619504000	482934	85.3505
FAM19-05	30170661	3017066100	518476	84.7194
FAM20-01	23974990	2397499000	444132	81.9952
FAM20-02	23091628	2309162800	435126	85.2285
FAM20-03	22761504	2276150400	506258	84.5767
FAM20-04	23341216	2334121600	479653	84.305
FAM21-01	22935314	2293531400	475359	84.4321
FAM21-02	31303168	3130316800	495369	83.6306
FAM21-03	27851820	2785182000	553784	85.0979
FAM21-04	25988768	2598876800	515894	84.7332
FAM22-01	22779936	2277993600	416432	84.537
FAM22-02	25775156	2577515600	508390	83.4828
FAM22-03	22481618	2248161800	480114	84.5227
FAM22-04	41898621	4189862100	636225	83.4719
Average	3.02973e+07	3.02973e+09	504825	83.5653
